# Supplementary material for: Comprehensive Analysis of the Molecular Characteristics and Prognosis value of AT II-associated Genes in Non-small Cell Lung Cancer
Source: Hindawi journal article supplement (doi:10.1155/2022/3106688), 2022-09-26

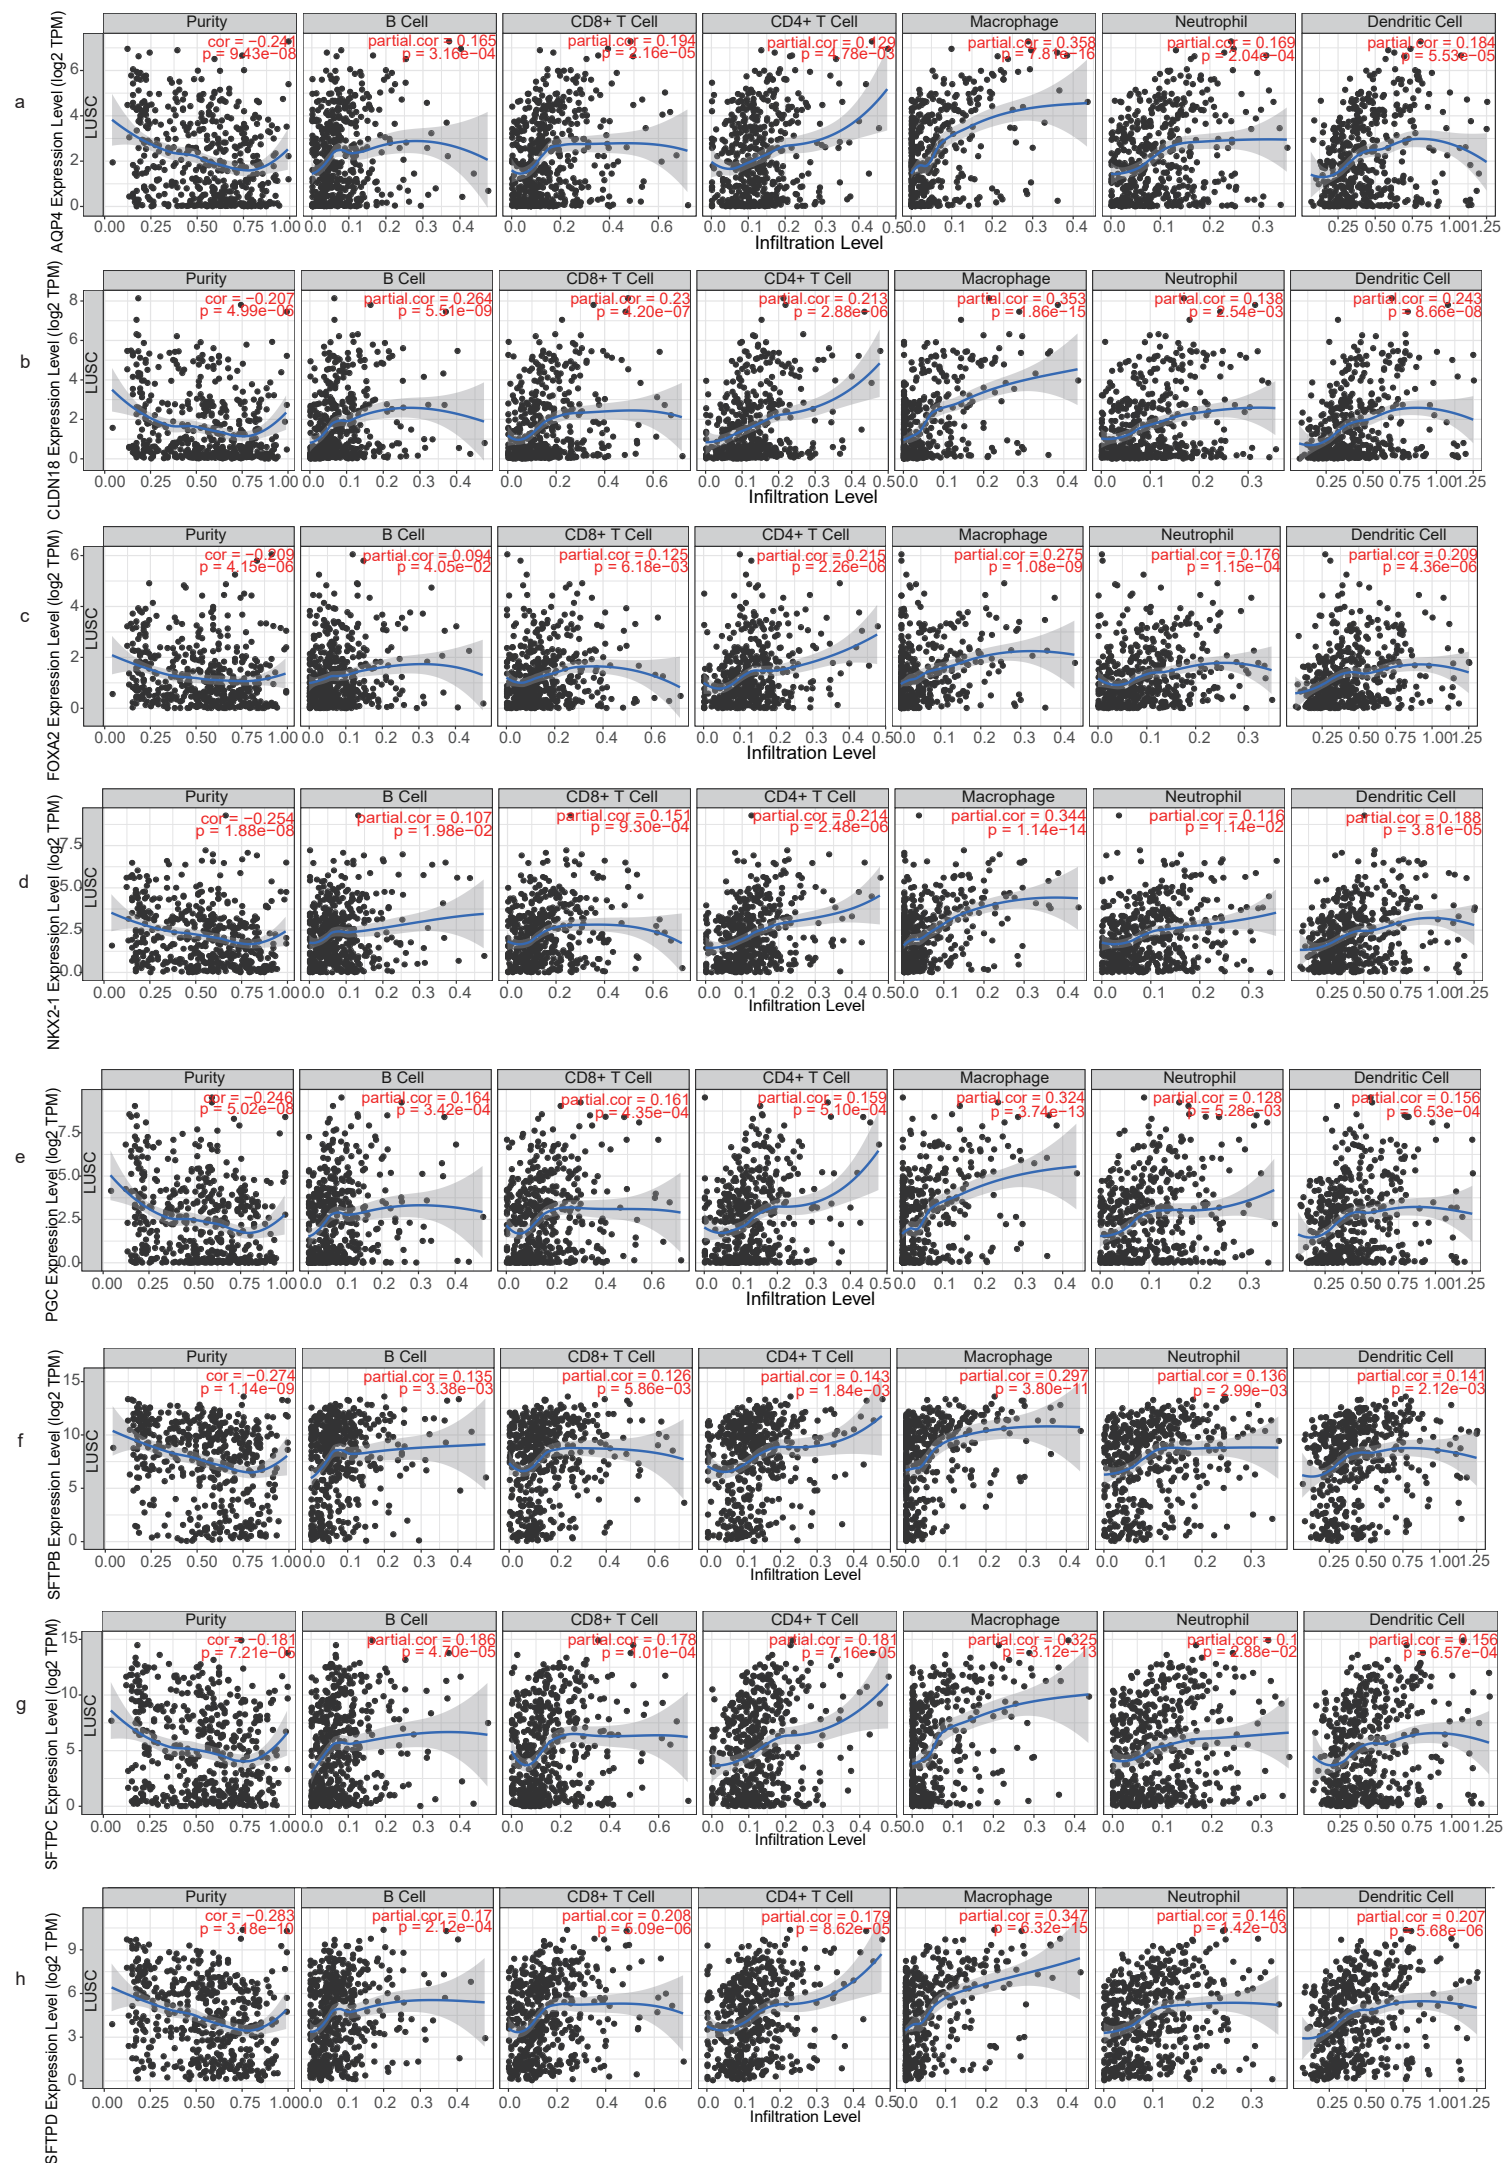

Supplement: f4 [file 3106688.f4.pdf]
